# Supplementary material
Source: publisher site journal article supplement (https://www.dovepress.com/article/426639)
Supplement: Supplementary file 1 [file get_supplementary_file.php]

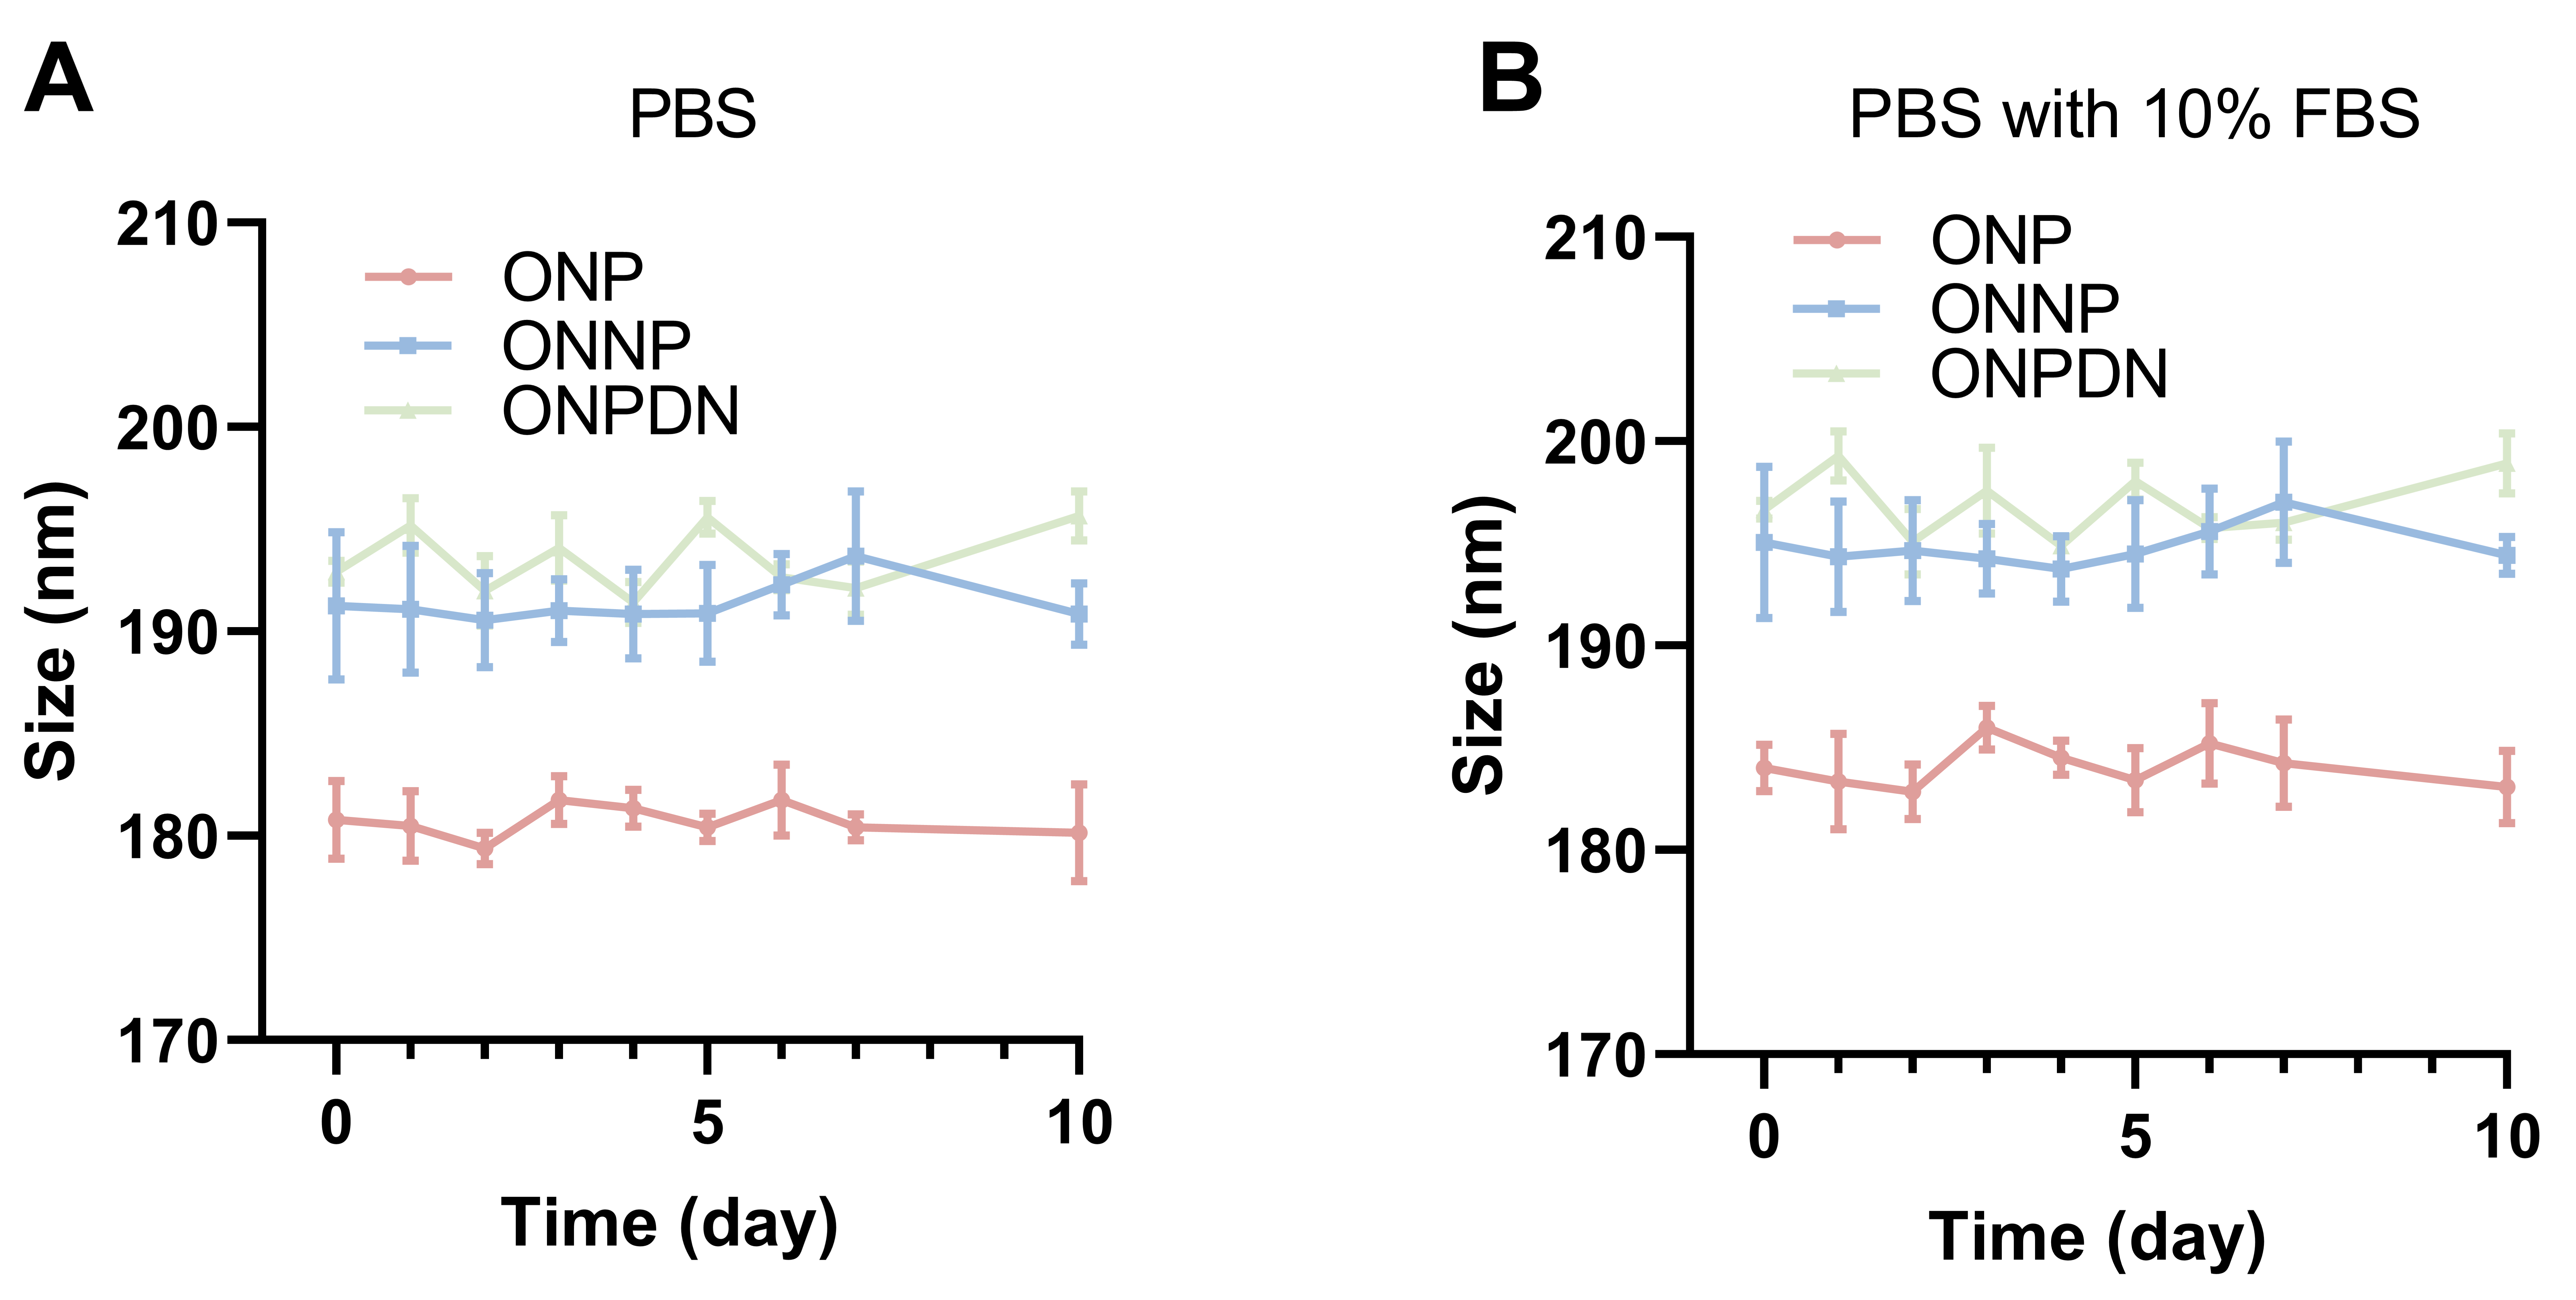


**Figure S1** Size changes of ONP, ONNP, and ONPDN in the (A) PBS and (B) PBS supplemented with 10% FBS.


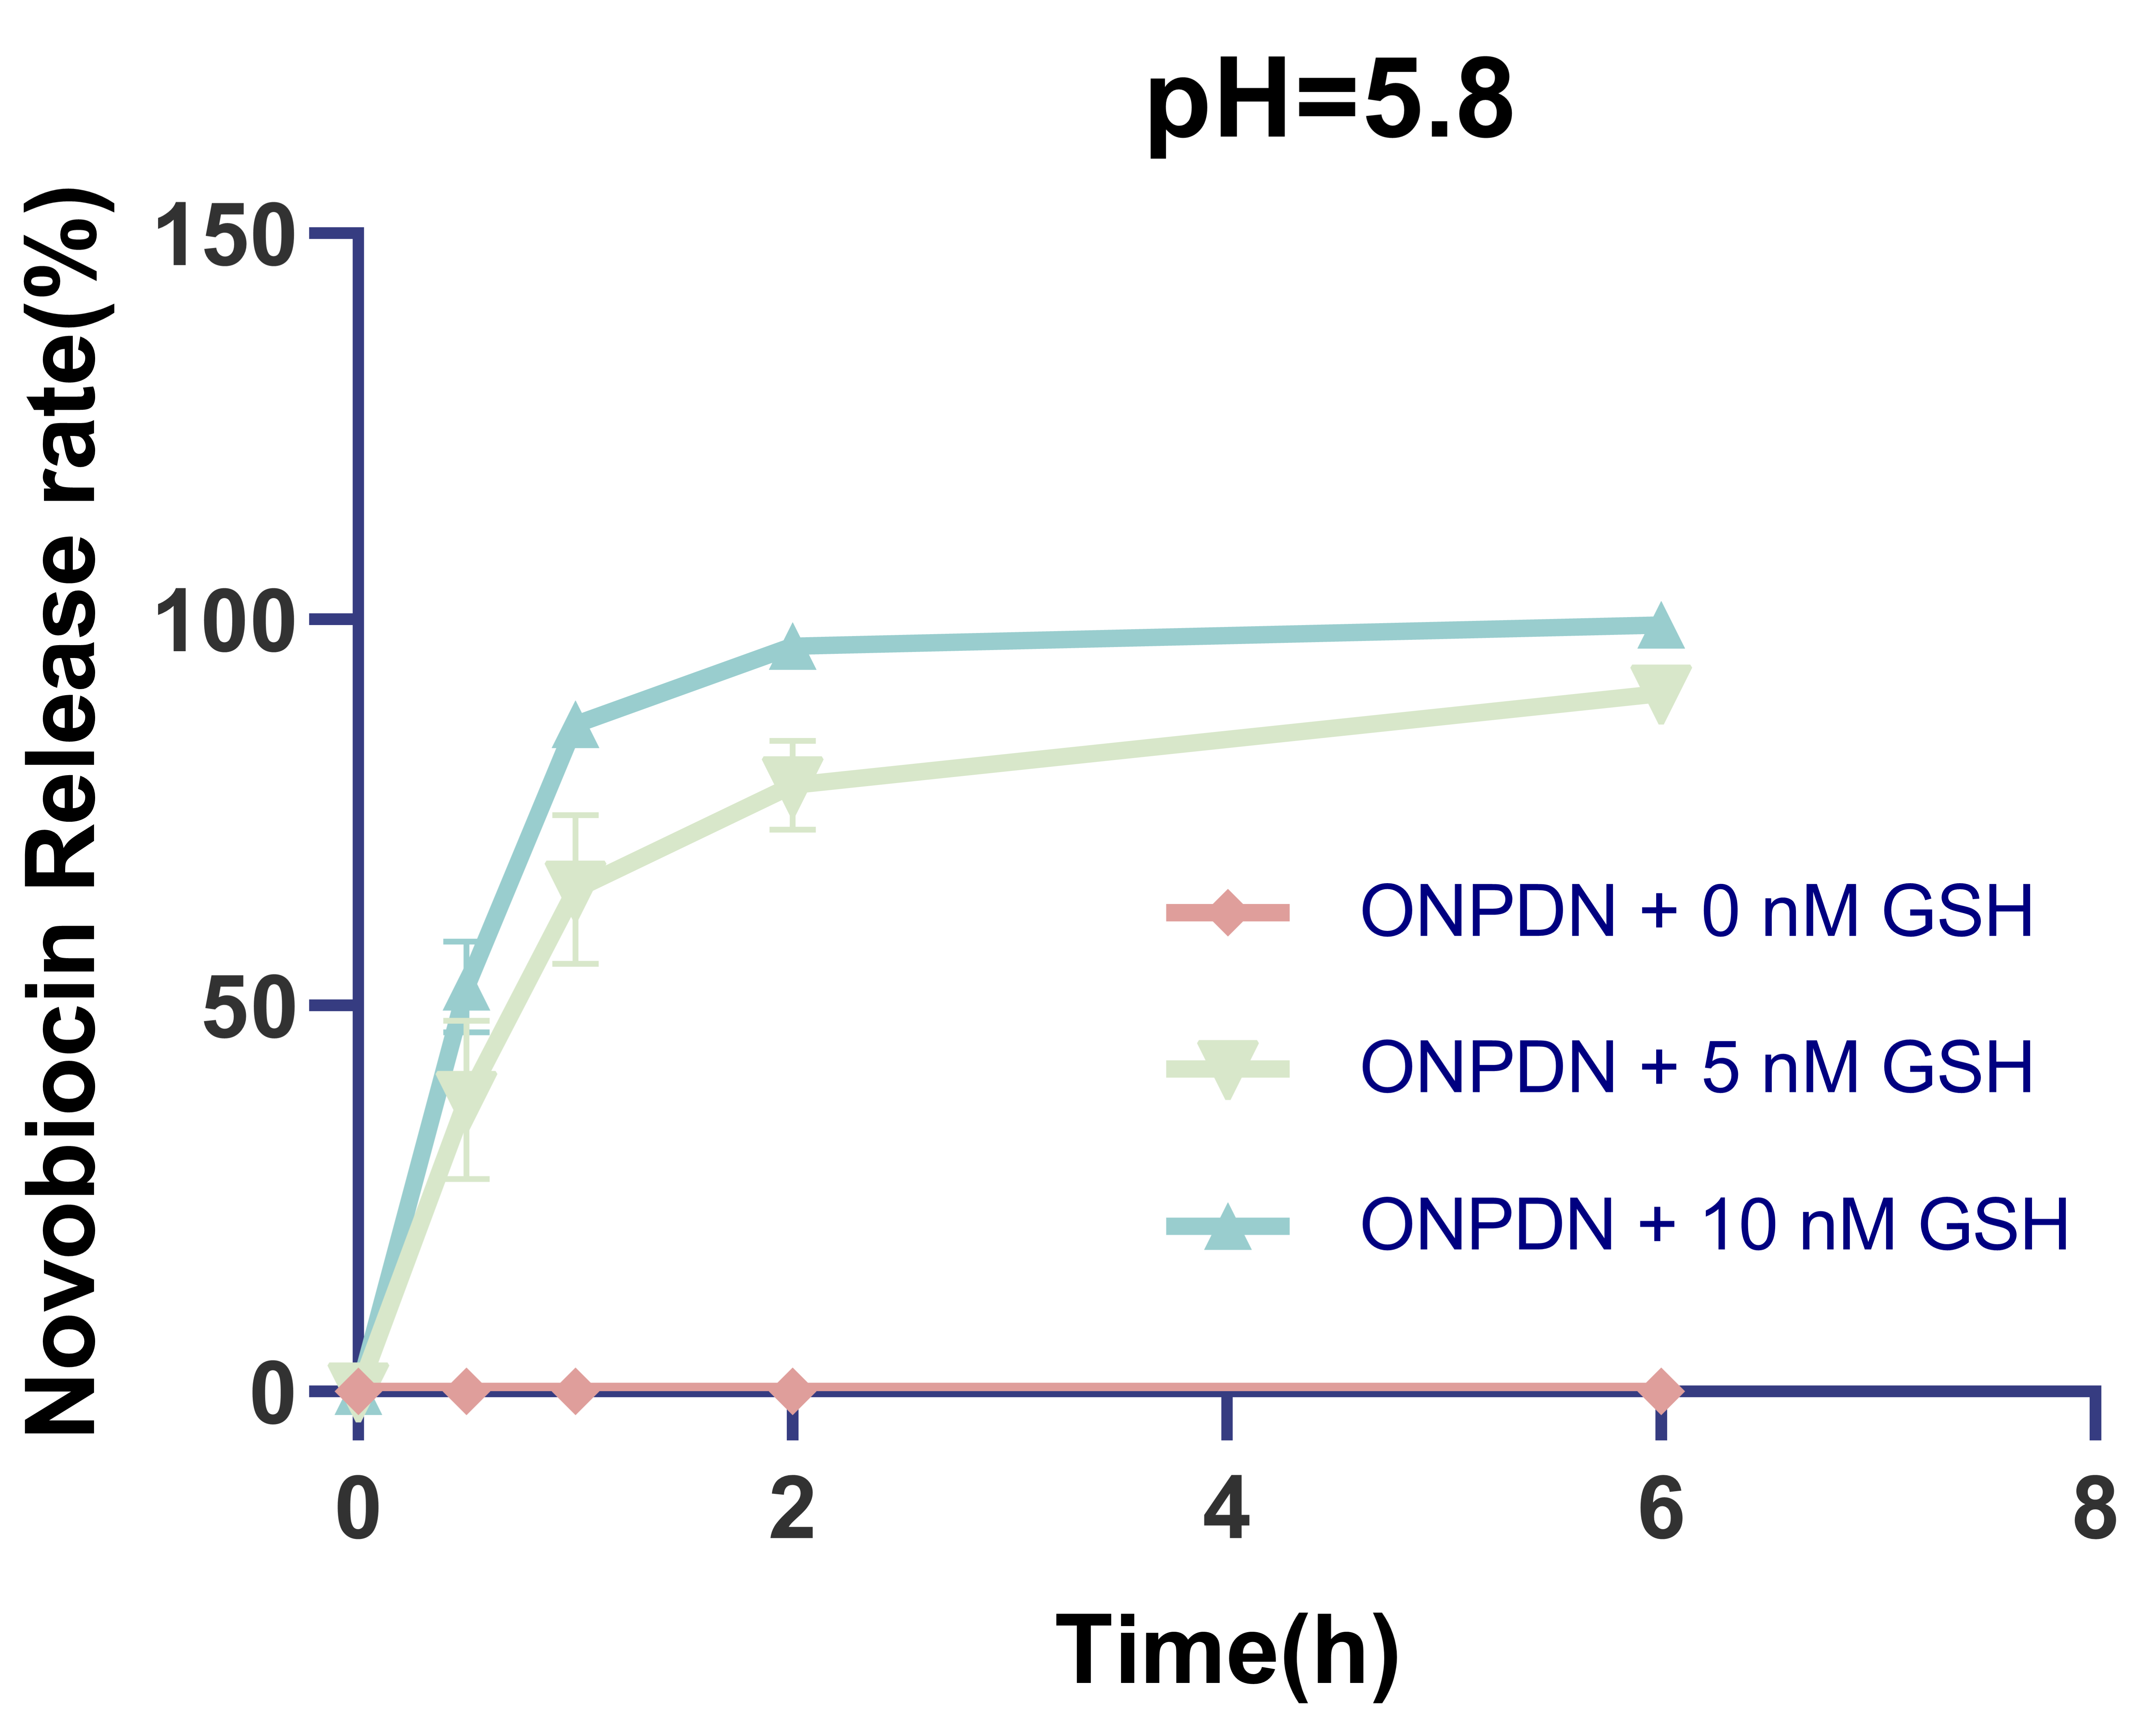


**Figure S2** Novobiocin release rate of ONPDN at pH=5.8 with different concentrations of GSH.


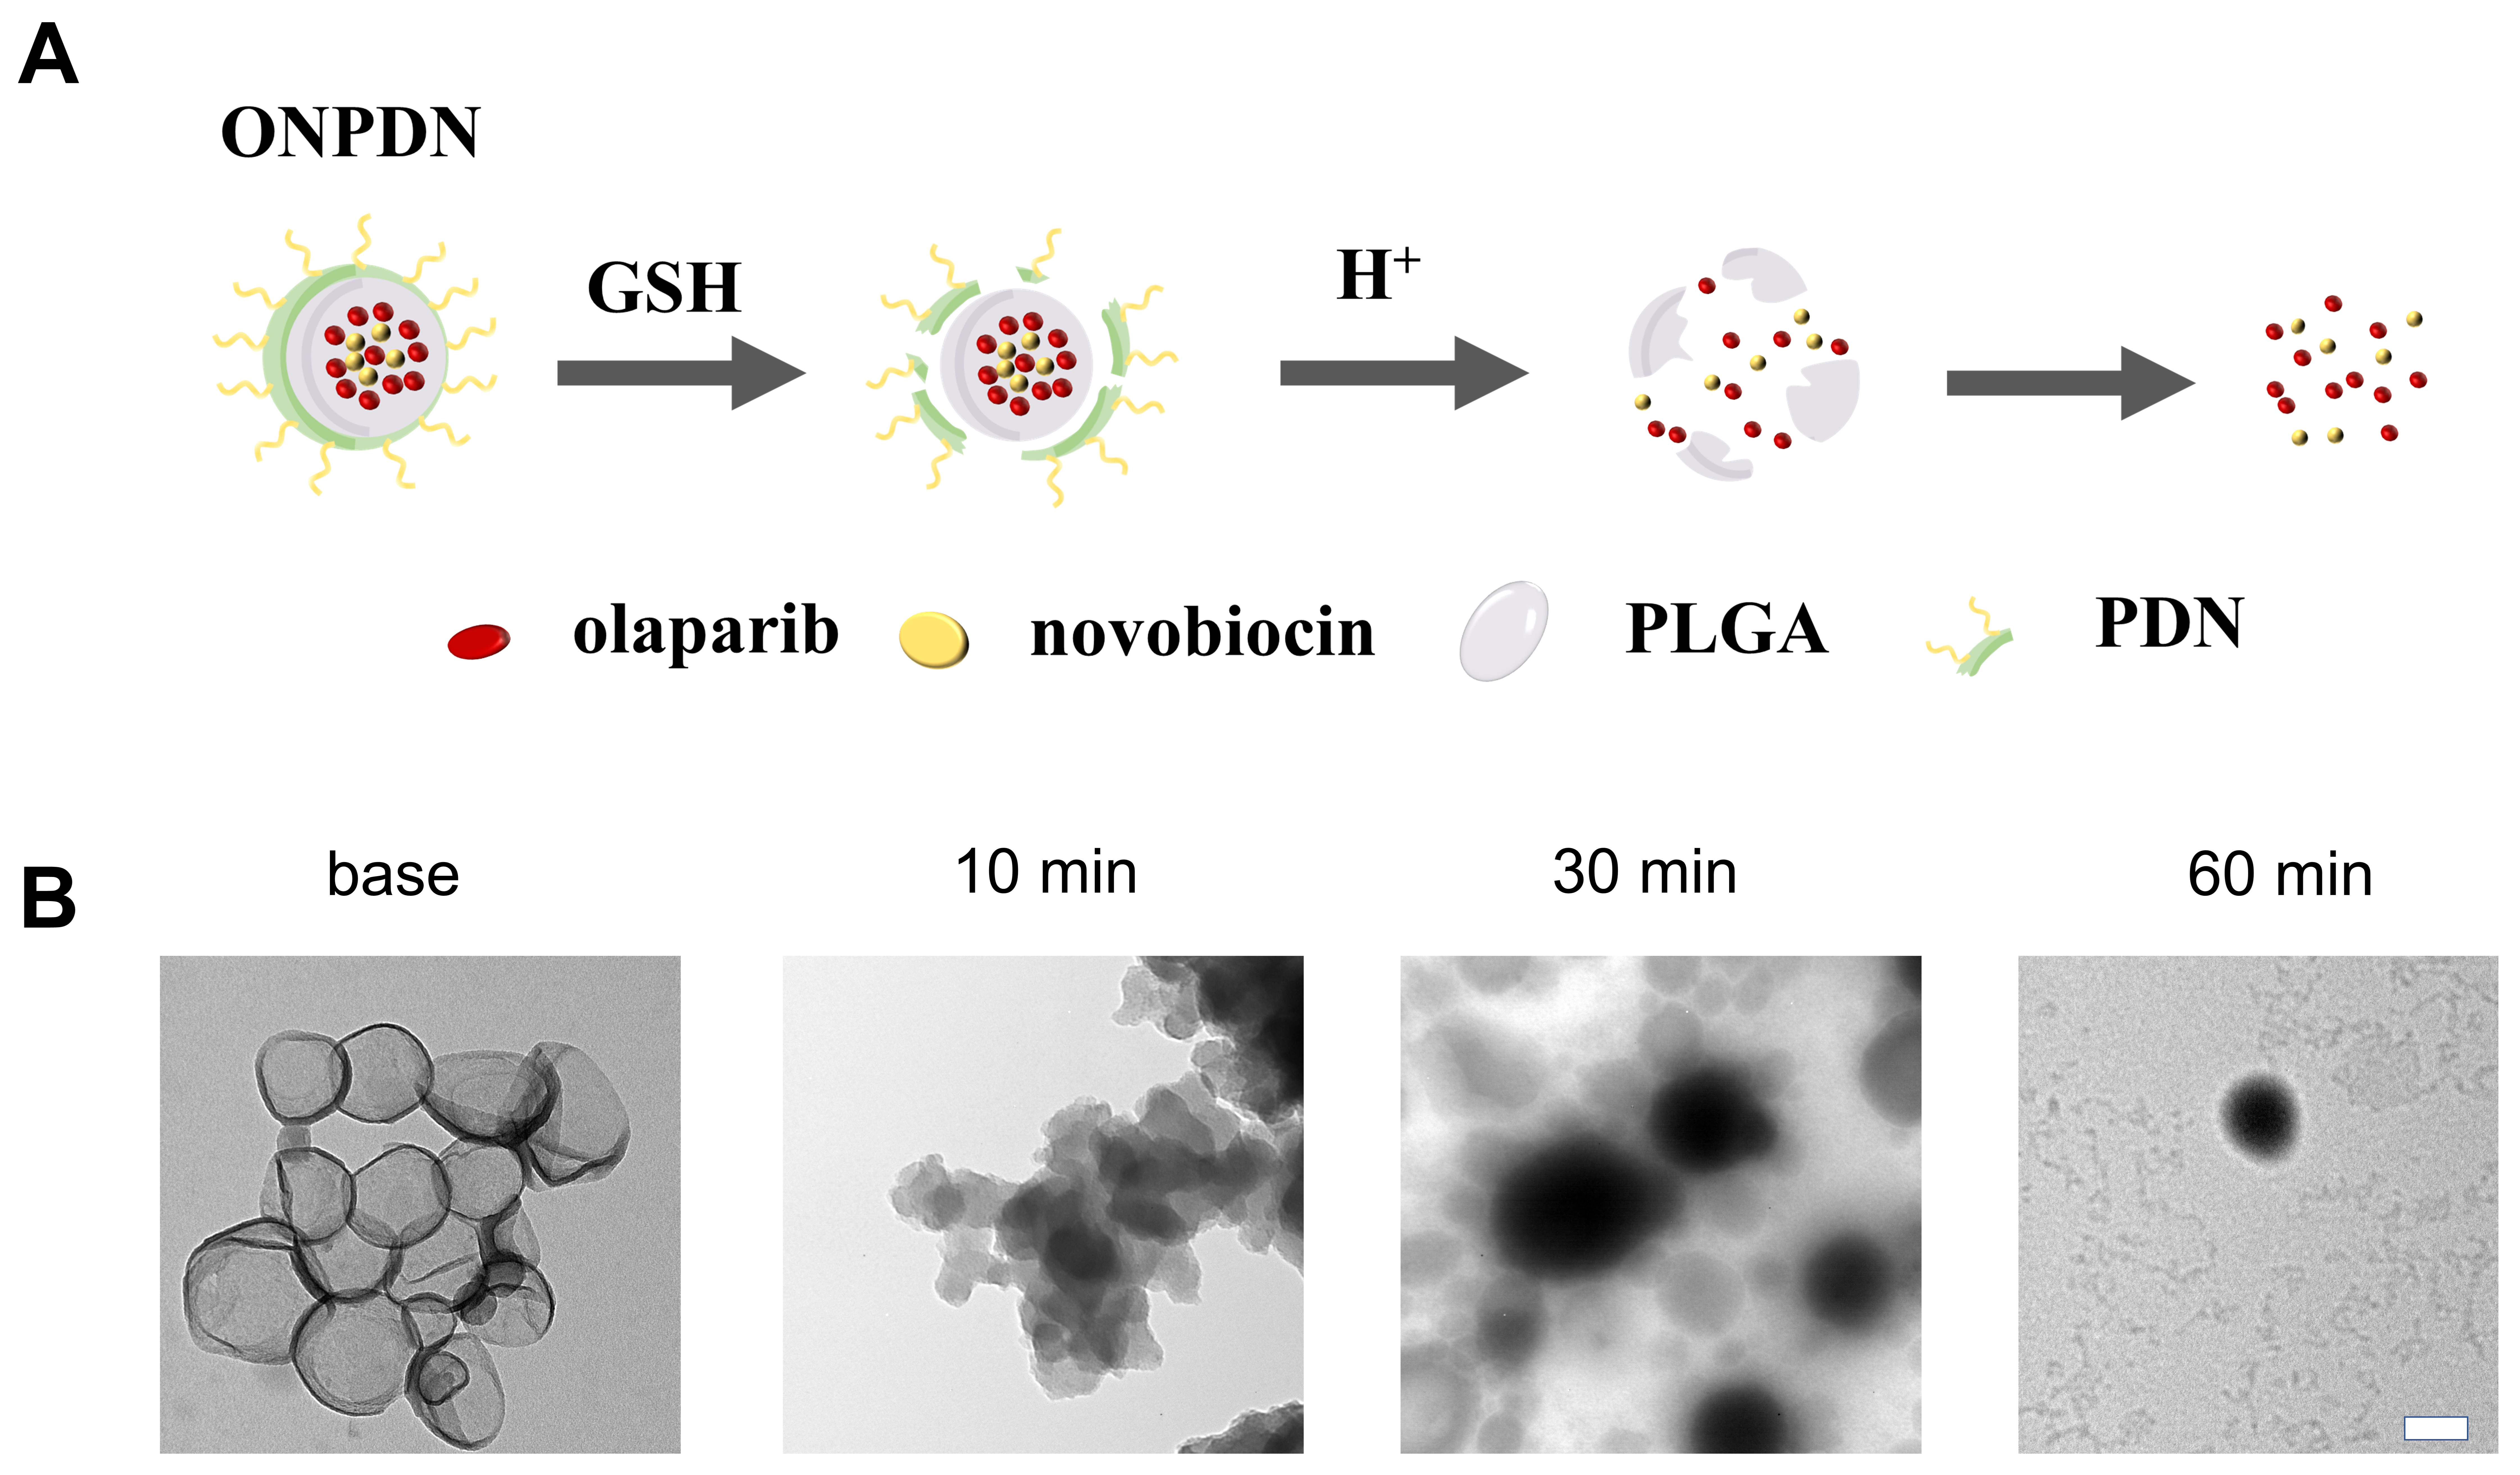


**Figure S3** Drug release of ONPDN. (A) Schematic illustration of the nanosystem's structural collapse and drug release triggered by an acidic glutathione environment. (B) TEM images of ONPDN at pH=5.8 and 10 mM of glutathione for 10, 30 and 60 minutes. Scale bar = 100 nm.





**Figure S4** Cytotoxicity of ONPDN. (A) IC50 values of MDA-MB-436, HCC1937, SKOV3 and MDA-MB-231 cells treated with free olaparib, olaparib and novobiocin (ON), OPDN and ONPDN. (B) Investigation of the growth inhibition effect on MDA-MB-231 cells treated with different concentrations of olaparib and novobiocin (ON), OPDN or ONPDN using a 48-hour MTT assay. (C) Evaluation of the growth inhibition effect on MDA-MB-231 cells treated with different concentrations of olaparib and novobiocin (ON), NPDN or ONPDN using a 48-hour MTT assay. **P < 0.01; ***P < 0.001.


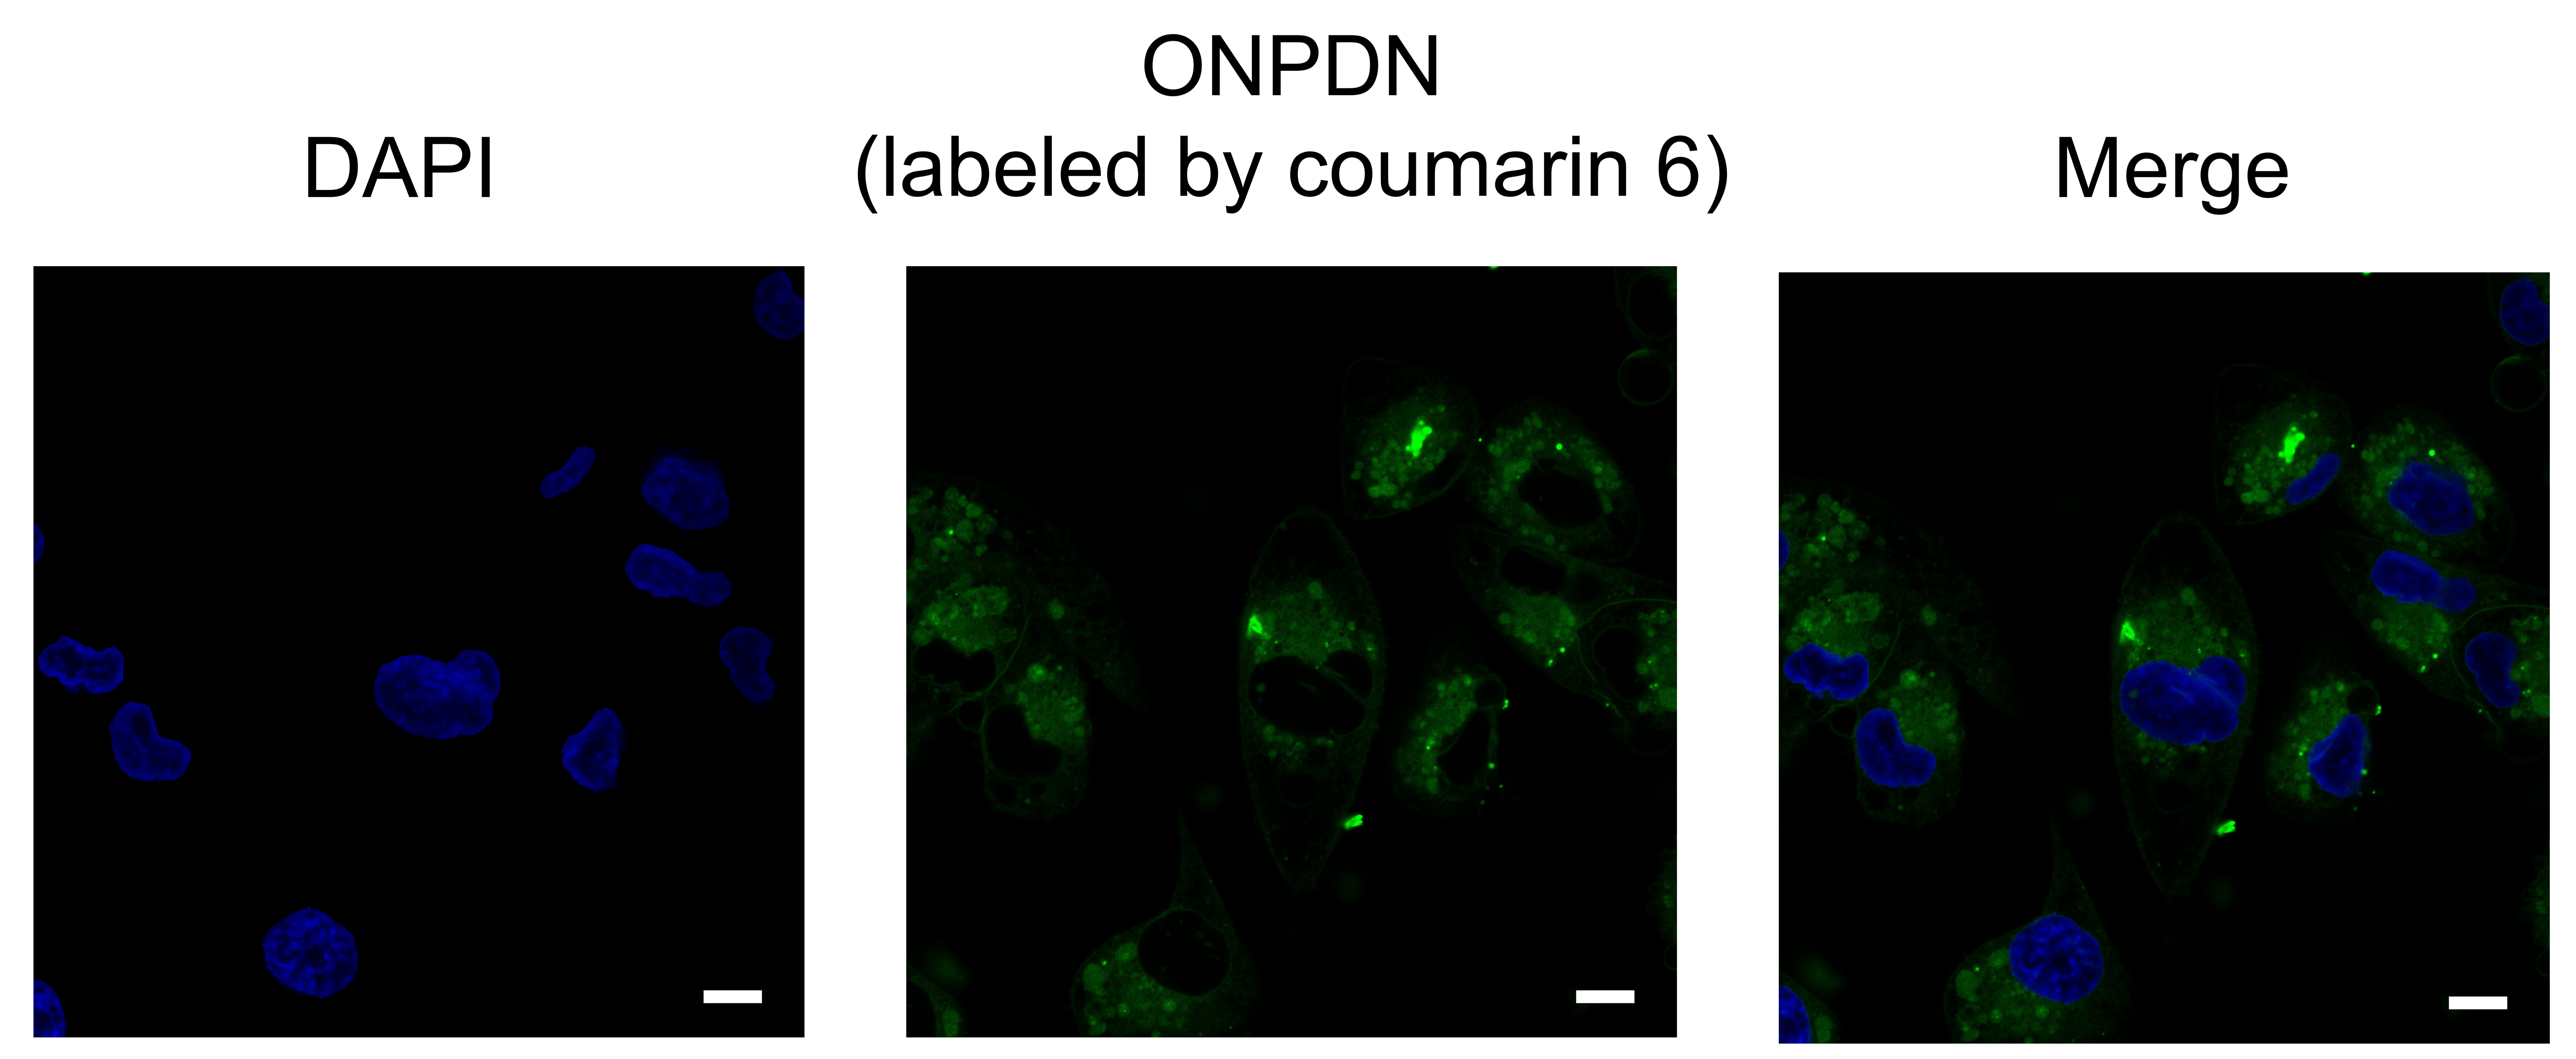


**Figure S5** *In vitro* uptake of ONPDN (labeled by coumarin 6) by MDA-MB-231 cells. Scale bar = 20 μm.


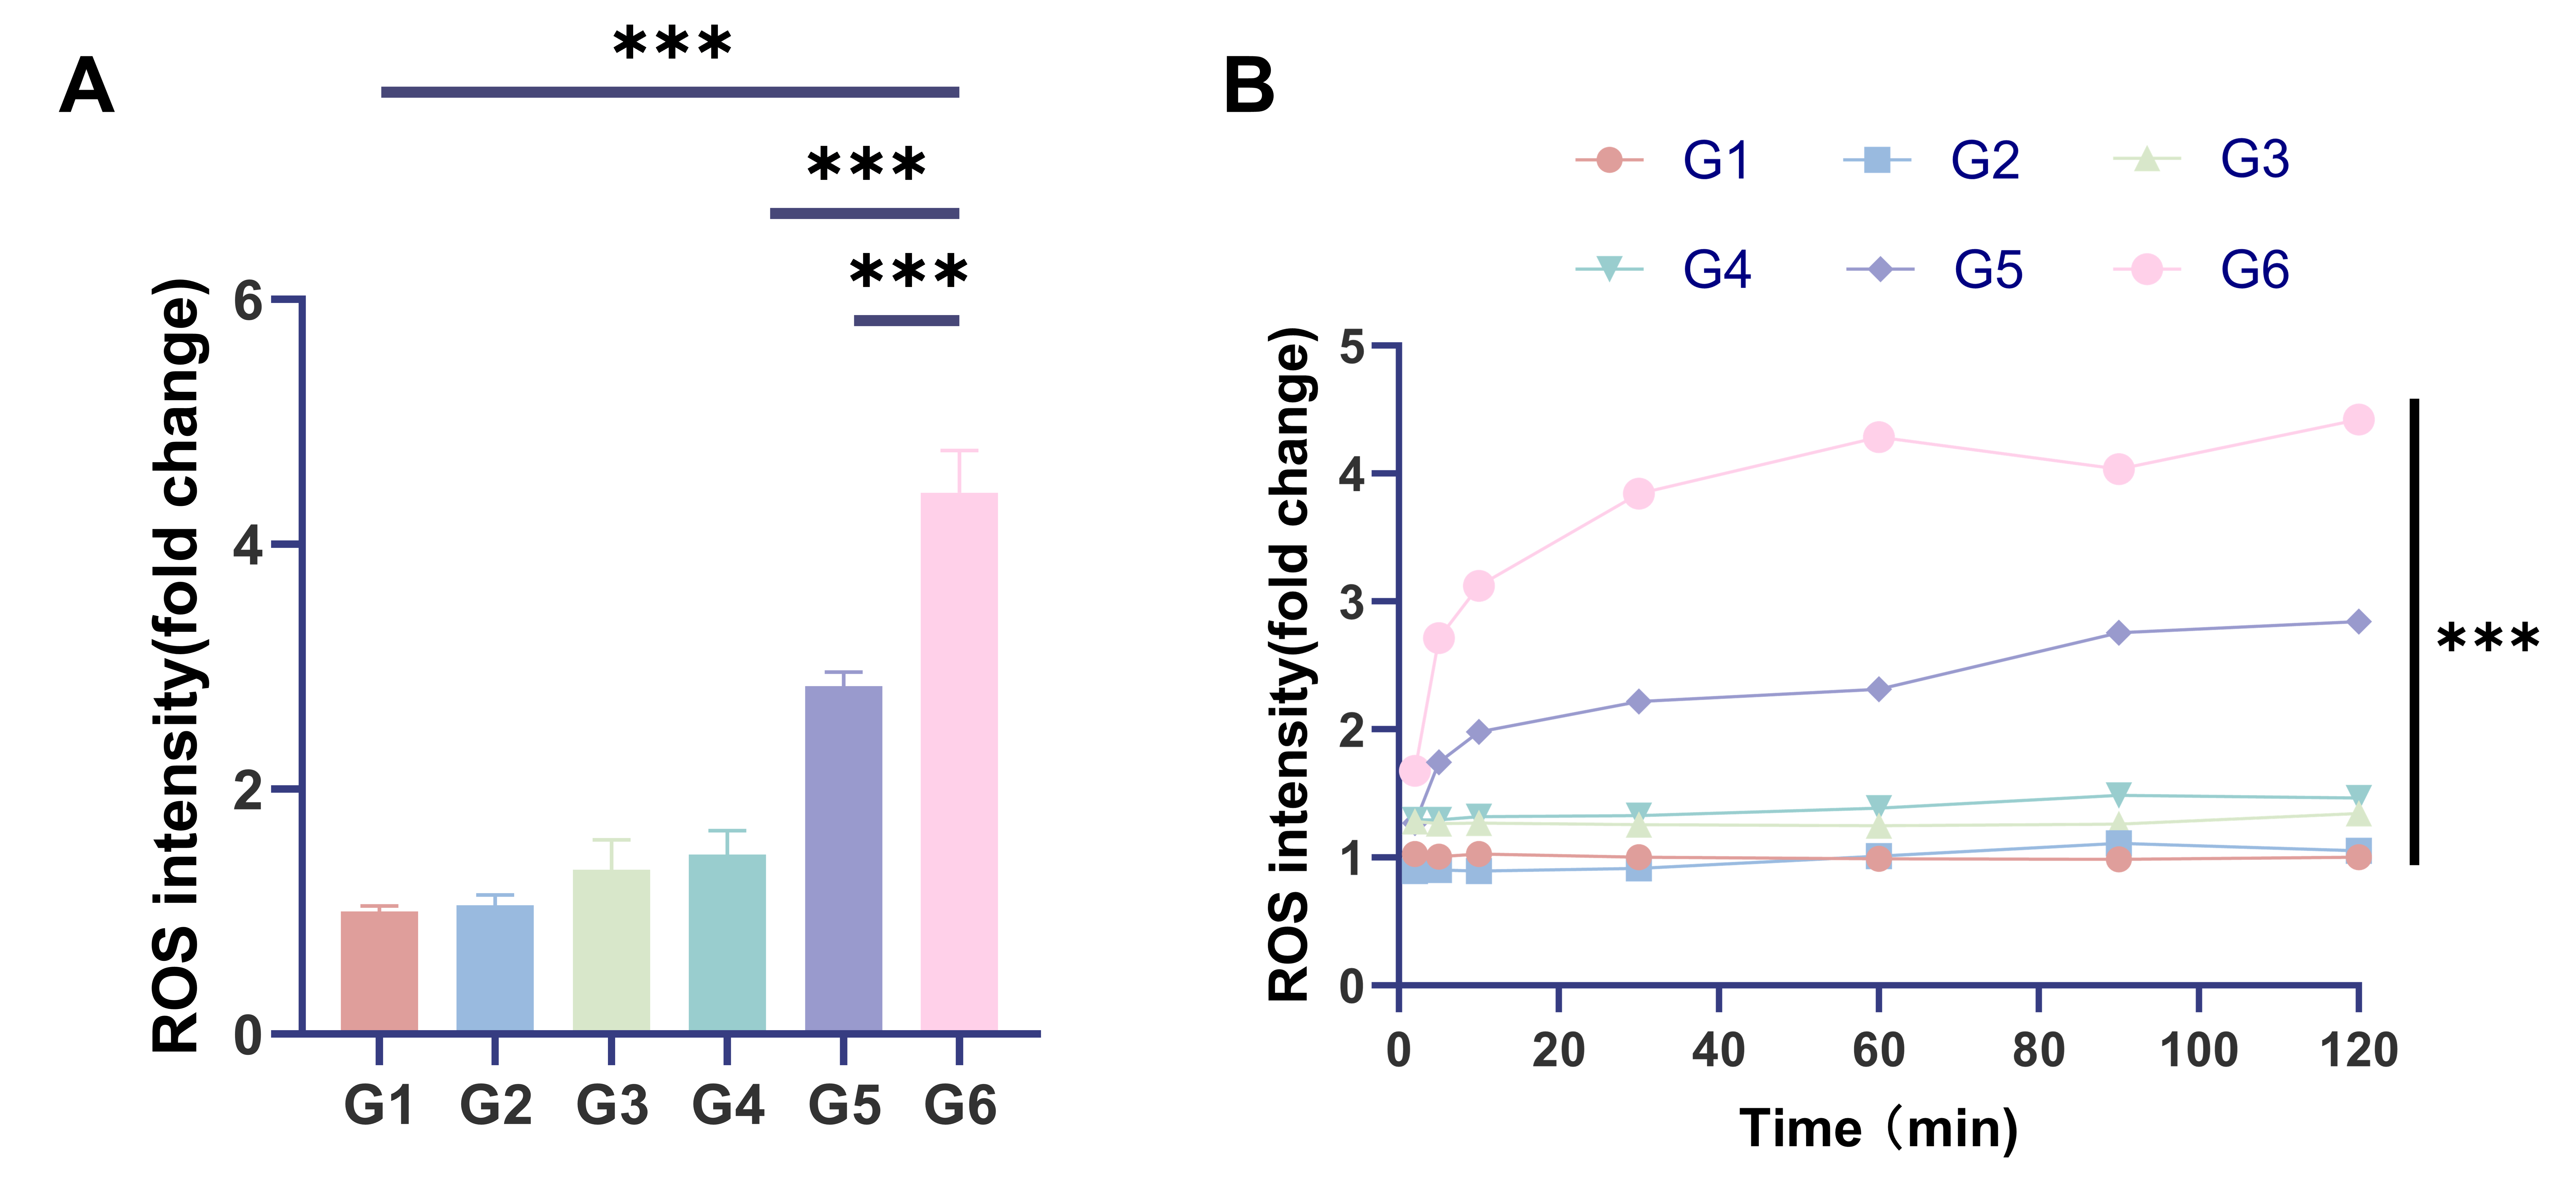


**Figure S6** ROS evaluation of ONPDN. (A) Normalized intracellular ROS intensities in MDA-MB-231 cells from Figure 3A. (B) ROS levels in MDA-MB-231 cells after treatment with PBS (G1), PDN (G2), olaparib and novobiocin (G3), NPDN (G4), OPDN (G5) or ONPDN (G6). All data are shown as mean ± SD (n = 3). ***P < 0.001.


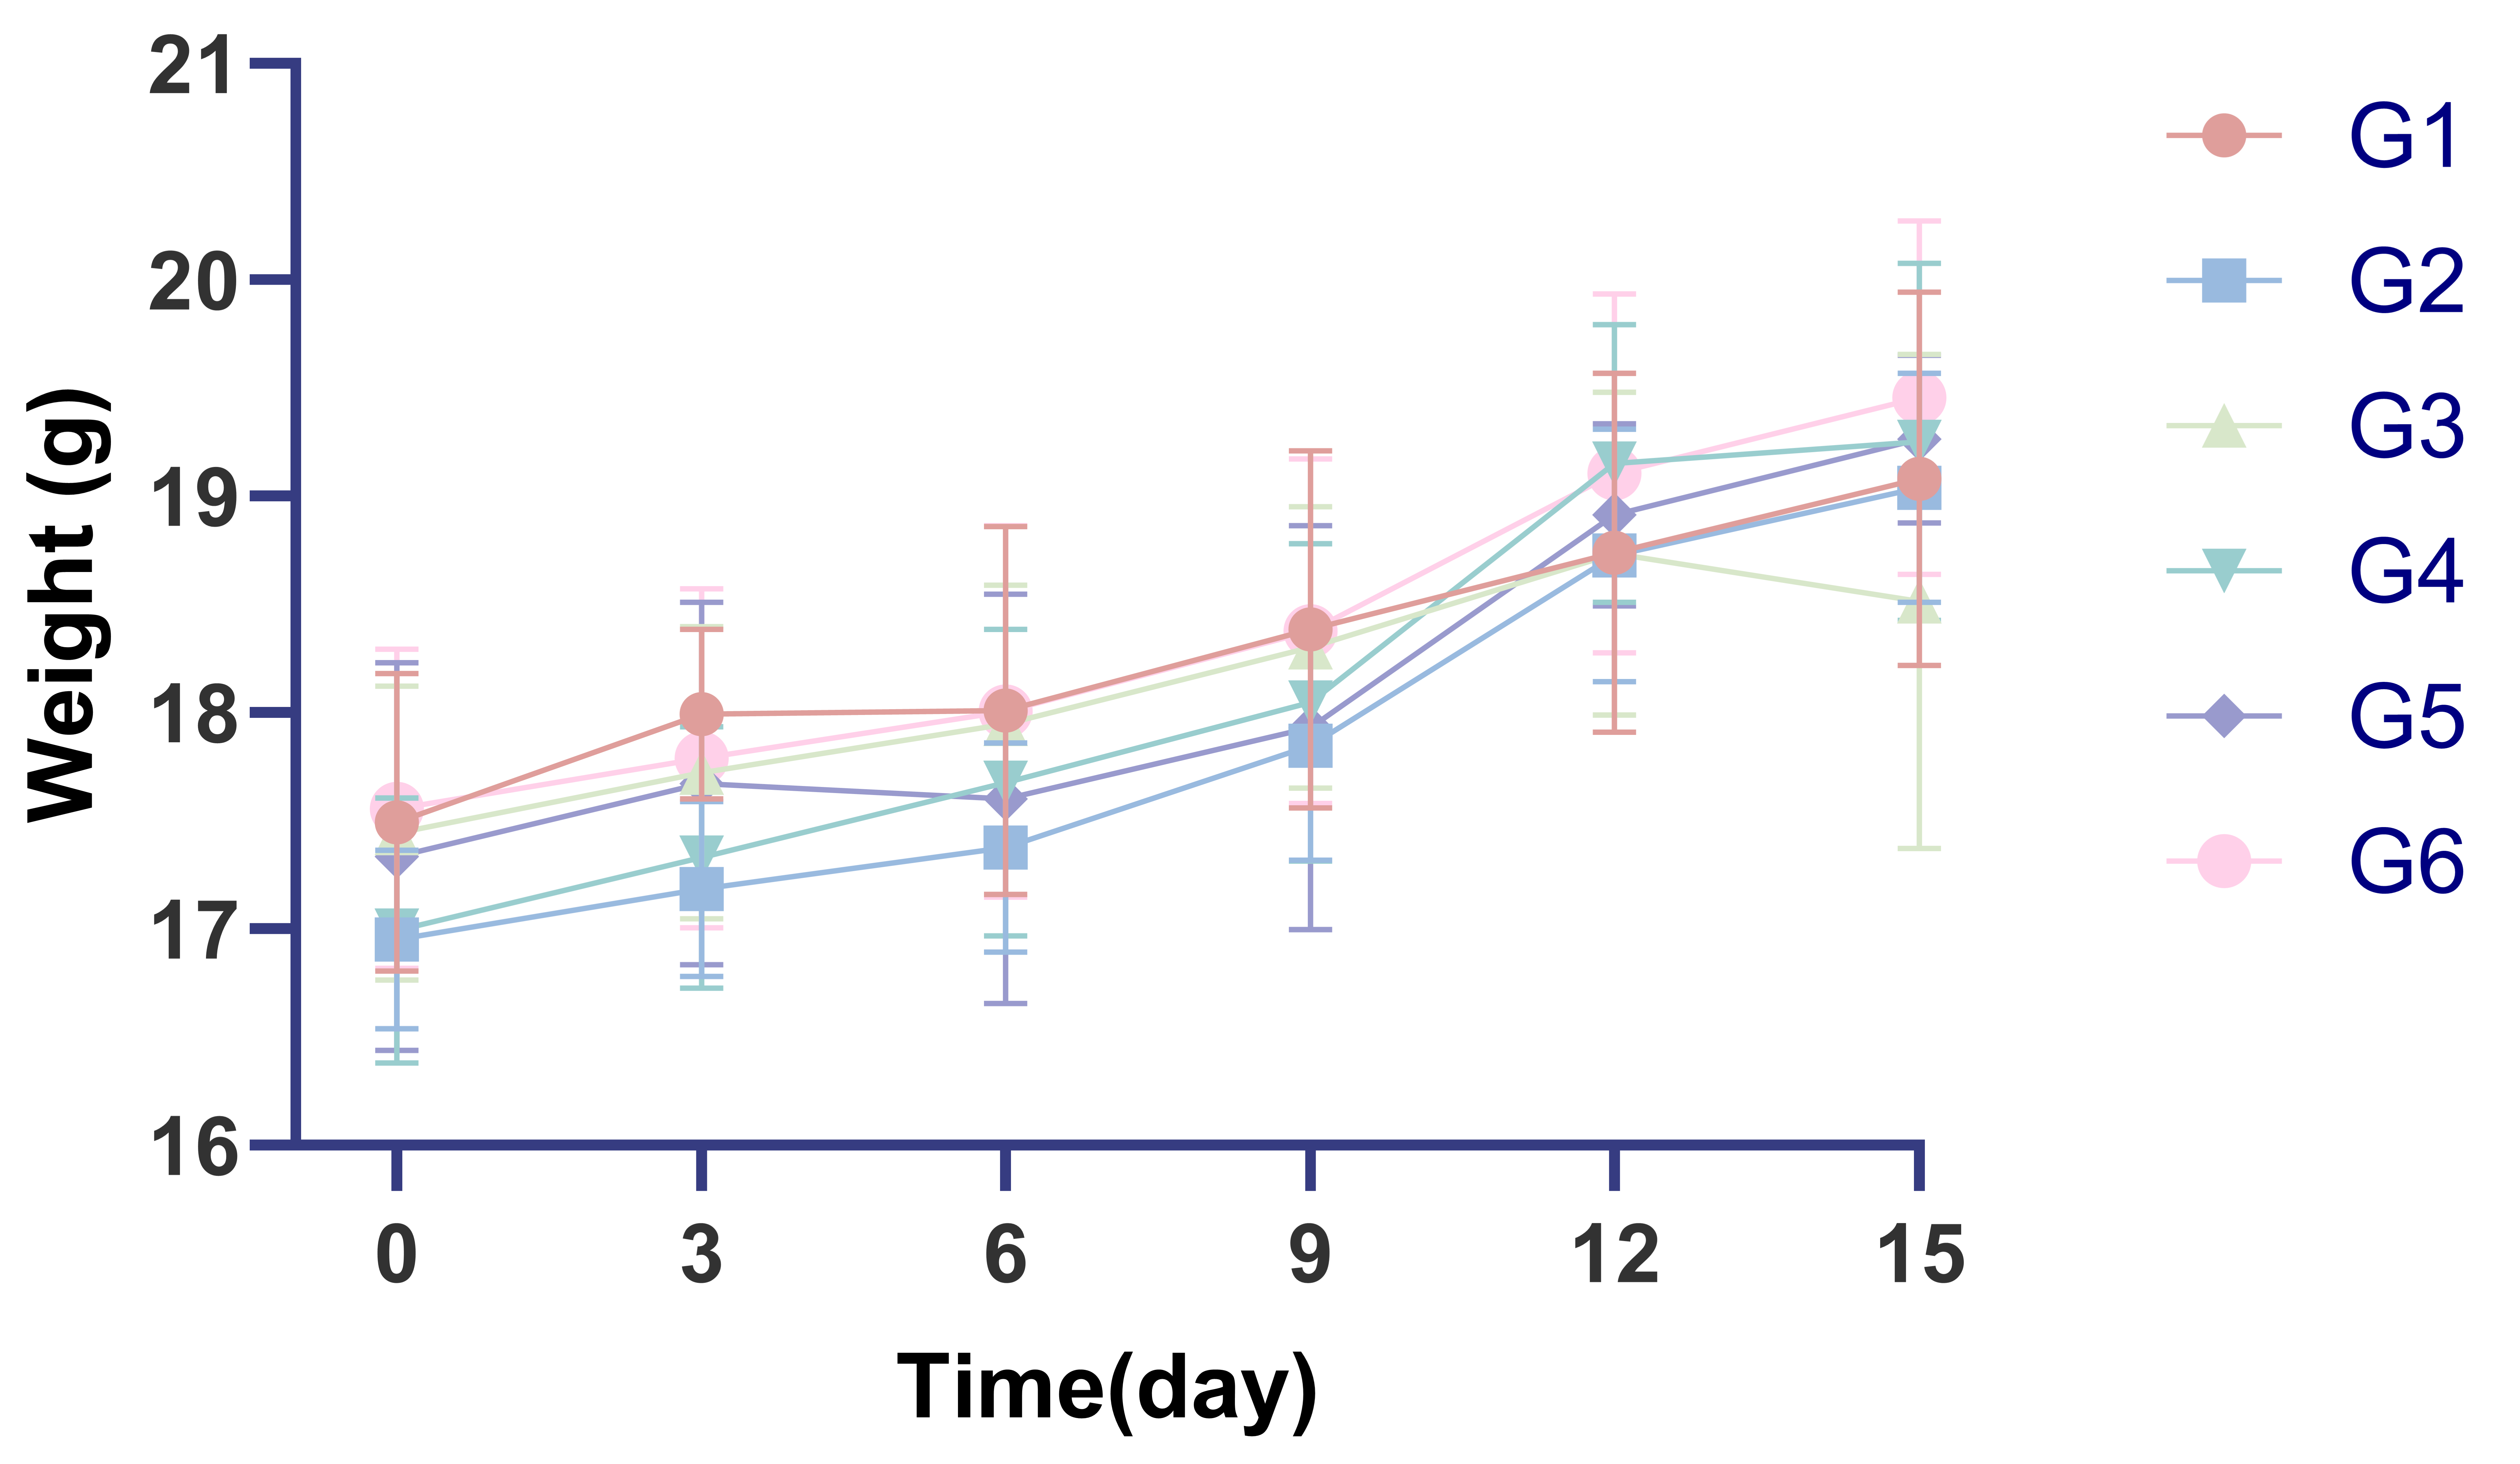


**Figure S7** Body weight of nude mice treated with PBS (G1), PDN (G2), olaparib and novobiocin (G3), NPDN (G4), OPDN (G5) or ONPDN (G6). All data are shown as mean ± SD (n = 4).
